# Supplementary material for: Discovery of SARS-CoV-2 Nsp14 and Nsp16 Methyltransferase Inhibitors by High-Throughput Virtual Screening
Source: MDPI journal article supplement (doi:10.3390/ph14121243), 2021-11-30
Supplement: s1 [file s1]

# Discovery of SARS-CoV-2 nsp14 and nsp16 methyltransferase inhibitors by high-throughput virtual screening

Raitis Bobrovs,<sup>†\*</sup> Iveta Kaņepe,<sup>†</sup> Nauris Narvaišs,<sup>†</sup> Liene Patetko,<sup>‡</sup> Gints Kalniņš,<sup>§</sup> Mihails Šišovs,<sup>§</sup> Anna L. Bula,<sup>†</sup> Solveiga Grīnberga,<sup>†</sup> Mārtiņš Boroduškis,<sup>‡</sup> Anna Ramata-Stunda,<sup>‡</sup> Nils Rostoks,<sup>‡</sup> Aigars Jirgensons,<sup>†</sup> Kaspars Tārs,<sup>§</sup> Kristaps Jaudzems

<sup>†</sup>Latvian Institute of Organic Synthesis, Aizkraukles 21, Riga LV-1006, Latvia

<sup>‡</sup>University of Latvia, Jelgavas 1, Riga LV-1004, Latvia

<sup>§</sup>Latvian Biomedical Research and Study Centre, Ratsupites 1 k1, Riga LV-1067, Latvia

## Enzymatic assay data

Table S1. The inhibition potency, ligand efficiency and target MTase of commercially obtained HTVS hits

| No | Compound<br>(MolPort ID)<br>(ZINC ID)                                                                                  | Target<br>MTase | Percent inhibition at 100 $\mu$ M, %<br>(IC <sub>50</sub> , $\mu$ M)<br>(Ligand Efficiency (LE), kcal/mol) |                                                        |                                                        |
|----|------------------------------------------------------------------------------------------------------------------------|-----------------|------------------------------------------------------------------------------------------------------------|--------------------------------------------------------|--------------------------------------------------------|
|    |                                                                                                                        |                 | nsp14                                                                                                      | nsp16                                                  | Human                                                  |
| 1  | 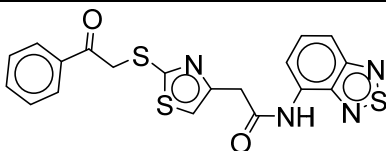<br>009-724-498<br>ZINC000038661771 | nsp14           | 58 $\pm$ 7<br>IC <sub>50</sub> =118 $\pm$ 4<br>LE=0.19                                                     | 69 $\pm$ 8<br>IC <sub>50</sub> =51 $\pm$ 2<br>LE=0.21  | 63 $\pm$ 5<br>IC <sub>50</sub> =58 $\pm$ 3<br>LE=0.21  |
| 2  | <br>009-161-166<br>ZINC000023398144 | nsp14           | 57 $\pm$ 8<br>IC <sub>50</sub> =77 $\pm$ 3<br>LE=0.23                                                      | 39 $\pm$ 7<br>IC <sub>50</sub> =197 $\pm$ 9<br>LE=0.21 | 21 $\pm$ 2<br>IC <sub>50</sub> =315 $\pm$ 5<br>LE=0.20 |
| 3  | <br>007-818-785<br>ZINC000033037945 | nsp14           | 56 $\pm$ 5<br>IC <sub>50</sub> =106 $\pm$ 5<br>LE=0.19                                                     | -8 $\pm$ 6<br>inactive                                 | 53 $\pm$ 8<br>IC <sub>50</sub> =125 $\pm$ 6<br>LE=0.19 |

|    |                                                                                                                             |       |                                             |                                              |                                             |
|----|-----------------------------------------------------------------------------------------------------------------------------|-------|---------------------------------------------|----------------------------------------------|---------------------------------------------|
| 4  | 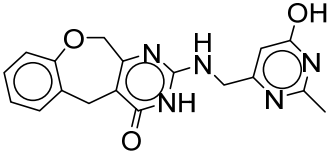 <p>028-735-286*<br/>ZINC000095519272</p>  | nsp16 | 49 ±17<br>IC <sub>50</sub> =~200<br>LE=0.19 | 57 ±13<br>IC <sub>50</sub> =95 ±4<br>LE=0.21 | 70 ±3<br>IC <sub>50</sub> =53 ±3<br>LE=0.22 |
| 5  |  <p>007-242-697<br/>ZINC000019718669</p>   | nsp14 | 49 ±16                                      | 66 ±9                                        | 52 ±4                                       |
| 6  |  <p>029-999-750<br/>ZINC000096114839</p>   | nsp14 | 28 ±7                                       | 17 ±5                                        | 83 ±6                                       |
| 7  |  <p>045-937-707<br/>ZINC000952973746</p>   | nsp14 | 27 ±9                                       | 38 ±6                                        | 41 ±1                                       |
| 8  |  <p>004-649-205<br/>ZINC000012821397</p> | nsp14 | 27 ±5                                       | 15 ±5                                        | -5 ±2                                       |
| 9  |  <p>023-306-621<br/>ZINC000072333096</p> | nsp14 | 25 ±10                                      | 33 ±12                                       | 17 ±4                                       |
| 10 |  <p>038-393-864<br/>ZINC000218615582</p> | nsp16 | 21 ±3                                       | 51 ±4                                        | 55 ±2                                       |
| 11 |  <p>006-348-599<br/>ZINC000030974583</p> | nsp16 | 19 ±1                                       | 45 ±11                                       | 48 ±8                                       |

|    |                                                                                                                        |       |        |        |            |
|----|------------------------------------------------------------------------------------------------------------------------|-------|--------|--------|------------|
| 12 | 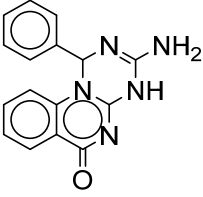<br>000-511-203<br>ZINC000008994271   | nsp16 | 19 ±10 | 39 ±3  | -3 ±6      |
| 13 | <br>045-910-851<br>ZINC000680227150   | nsp14 | 19 ±7  | 23 ±5  | not tested |
| 14 | <br>046-744-664<br>ZINC1772709012     | nsp16 | 16 ±13 | 32 ±8  | not tested |
| 15 | <br>046-750-782<br>ZINC1772809556    | nsp14 | 15 ±9  | 5 ±8   | not tested |
| 16 | <br>021-745-257<br>ZINC000072406141 | nsp14 | 14 ±7  | 31 ±8  | not tested |
| 17 | <br>009-255-069<br>ZINC000032754717 | nsp14 | 14 ±6  | -24 ±9 | not tested |
| 18 | <br>038-397-244<br>ZINC000252528037 | nsp14 | 13 ±2  | 36 ±3  | not tested |

|                                 |                                                                                     |       |        |        |            |
|---------------------------------|-------------------------------------------------------------------------------------|-------|--------|--------|------------|
| 19                              | 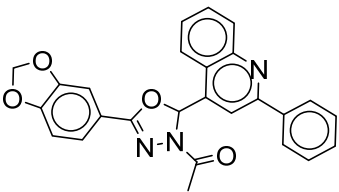   | nsp14 | 12 ±4  | 36 ±10 | 45 ±7      |
| 010-686-097<br>ZINC000021941344 |                                                                                     |       |        |        |            |
| 20                              |    | nsp14 | 12 ±5  | 9 ±8   | not tested |
| 020-196-938<br>ZINC000071682020 |                                                                                     |       |        |        |            |
| 21                              |    | nsp14 | 11 ±10 | 24 ±5  | not tested |
| 045-941-016<br>ZINC000952966781 |                                                                                     |       |        |        |            |
| 22                              |   | nsp16 | 11 ±3  | 39 ±8  | not tested |
| 019-887-754<br>ZINC000067754517 |                                                                                     |       |        |        |            |
| 23                              |  | nsp14 | 11 ±6  | 17 ±6  | not tested |
| 000-846-375<br>ZINC000018085229 |                                                                                     |       |        |        |            |
| 24                              |  | nsp16 | 10 ±9  | 7 ±4   | not tested |
| 007-880-423<br>ZINC000021649685 |                                                                                     |       |        |        |            |
| 25                              |  | nsp14 | 10 ±6  | -8 ±4  | not tested |
| 007-610-022<br>ZINC000009617688 |                                                                                     |       |        |        |            |

|                                 |                                                                                     |       |      |       |            |
|---------------------------------|-------------------------------------------------------------------------------------|-------|------|-------|------------|
| 26                              | 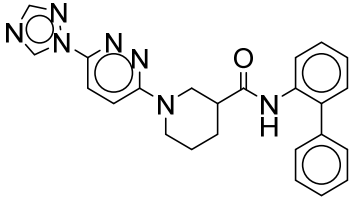   | nsp14 | 9 ±7 | 10 ±1 | not tested |
| 028-851-132<br>ZINC000096124096 |                                                                                     |       |      |       |            |
| 27                              |    | nsp16 | 9 ±3 | 32 ±7 | not tested |
| 010-695-959<br>ZINC000033268761 |                                                                                     |       |      |       |            |
| 28                              |    | nsp14 | 9 ±4 | 11 ±5 | not tested |
| 002-297-972<br>ZINC000016448507 |                                                                                     |       |      |       |            |
| 29                              |   | nsp14 | 9 ±5 | 40 ±8 | 61 ±4      |
| 005-070-505<br>ZINC000012755219 |                                                                                     |       |      |       |            |
| 30                              |  | nsp16 | 9 ±6 | 24 ±4 | 21 ±6      |
| 027-822-894<br>ZINC000091693861 |                                                                                     |       |      |       |            |
| 31                              |  | nsp16 | 9 ±3 | 40 ±6 | 22 ±6      |
| 035-370-066<br>ZINC000215108606 |                                                                                     |       |      |       |            |
| 32                              |  | nsp14 | 8 ±3 | 37 ±9 | not tested |
| 004-007-966<br>ZINC000019078629 |                                                                                     |       |      |       |            |
| 33                              |  | nsp16 | 8 ±5 | -4 ±3 | 42 ±2      |
| 028-736-920                     |                                                                                     |       |      |       |            |

|                                 |                                                                                     |       |      |        |            |
|---------------------------------|-------------------------------------------------------------------------------------|-------|------|--------|------------|
| ZINC000095521577                |                                                                                     |       |      |        |            |
| 34                              | 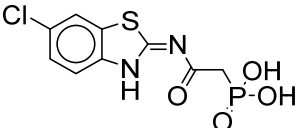   | nsp16 | 7 ±6 | 17 ±7  | not tested |
| 000-770-854<br>ZINC000020502712 |                                                                                     |       |      |        |            |
| 35                              |    | nsp14 | 6 ±2 | 15 ±2  | not tested |
| 046-170-871<br>ZINC1548405210   |                                                                                     |       |      |        |            |
| 36                              |    | nsp14 | 5 ±6 | 15 ±10 | not tested |
| 044-561-472<br>ZINC000077301924 |                                                                                     |       |      |        |            |
| 37                              |   | nsp14 | 5 ±5 | 17 ±11 | not tested |
| 005-137-833<br>ZINC000011821342 |                                                                                     |       |      |        |            |
| 38                              |  | nsp14 | 5 ±2 | -15 ±6 | not tested |
| 000-859-258<br>ZINC000012895535 |                                                                                     |       |      |        |            |
| 39                              |  | nsp16 | 5 ±4 | -68 ±6 | not tested |
| 028-855-794<br>ZINC000096115284 |                                                                                     |       |      |        |            |
| 40                              |  | nsp14 | 5 ±2 | 19 ±7  | -46 ±2     |
| 030-055-667<br>ZINC000097636636 |                                                                                     |       |      |        |            |

|    |                                                                                                                        |       |       |       |            |
|----|------------------------------------------------------------------------------------------------------------------------|-------|-------|-------|------------|
| 41 | 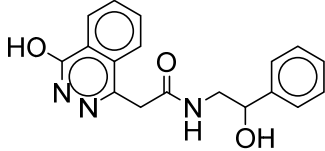<br>000-856-143<br>ZINC000009340377   | nsp16 | 5 ±4  | 2 ±5  | not tested |
| 42 | <br>044-430-985<br>ZINC000604419204   | nsp14 | 5 ±11 | -3 ±5 | not tested |
| 43 | <br>006-828-073<br>ZINC000035326963   | nsp16 | 4 ±8  | -2 ±6 | not tested |
| 44 | <br>044-563-263<br>ZINC000019345667  | nsp14 | 4 ±1  | 22 ±6 | not tested |
| 45 | <br>004-060-271<br>ZINC000003404544 | nsp14 | 3 ±2  | 6 ±8  | not tested |
| 46 | <br>044-674-956<br>ZINC000534574506 | nsp16 | 3 ±3  | 17 ±8 | not tested |
| 47 | <br>038-401-110<br>ZINC000219517301 | nsp14 | 3 ±4  | 28 ±8 | not tested |

|    |                                                                                     |       |      |         |            |
|----|-------------------------------------------------------------------------------------|-------|------|---------|------------|
| 48 | 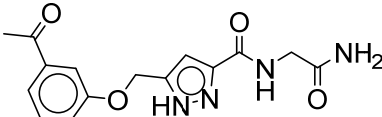   | nsp16 | 2 ±2 | -1 ±3   | not tested |
|    | 019-899-381<br>ZINC000067920483                                                     |       |      |         |            |
| 49 |    | nsp16 | 2 ±8 | 19 ±6   | not tested |
|    | 005-103-886<br>ZINC000012152850                                                     |       |      |         |            |
| 50 |    | nsp14 | 2 ±0 | -10 ±1  | not tested |
|    | 009-042-162<br>ZINC000019688789                                                     |       |      |         |            |
| 51 |   | nsp16 | 2 ±0 | 6 ±6    | not tested |
|    | 003-162-096<br>ZINC000004940485                                                     |       |      |         |            |
| 52 |  | nsp16 | 2 ±7 | -24 ±4  | not tested |
|    | 045-938-431<br>ZINC000952975967                                                     |       |      |         |            |
| 53 |  | nsp14 | 1 ±6 | 8 ±5    | not tested |
|    | 042-563-901<br>ZINC000426470786                                                     |       |      |         |            |
| 54 |  | nsp16 | 0 ±2 | -35 ±10 | not tested |
|    | 000-251-117<br>ZINC000001797008                                                     |       |      |         |            |
| 55 |  | nsp16 | 0 ±7 | 22 ±12  | 44 ±8      |
|    | 027-887-115<br>ZINC000092001674                                                     |       |      |         |            |



|    |                                                                                                                        |       |       |       |            |
|----|------------------------------------------------------------------------------------------------------------------------|-------|-------|-------|------------|
| 56 | 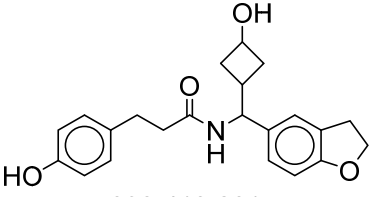<br>038-410-201<br>ZINC000220681335   | nsp14 | 0 ±2  | 10 ±5 | not tested |
| 57 | <br>021-759-980<br>ZINC000072429175   | nsp14 | 0 ±4  | 6 ±5  | not tested |
| 58 | <br>042-578-273<br>ZINC000426716892   | nsp16 | -1 ±2 | 30 ±2 | not tested |
| 59 | <br>020-232-114<br>ZINC000072172639  | nsp16 | -1 ±2 | 29 ±5 | not tested |
| 60 | <br>002-245-502<br>ZINC000004649202 | nsp16 | -1 ±3 | 14 ±5 | not tested |
| 61 | <br>005-074-359<br>ZINC000020999776 | nsp14 | -2 ±4 | 8 ±5  | not tested |
| 62 | <br>035-814-299<br>ZINC000170622294 | nsp16 | -2 ±2 | -6 ±3 | not tested |
| 63 | <br>016-617-317<br>ZINC000065452571 | nsp14 | -3 ±8 | -2 ±5 | not tested |

|    |                                                                                                                        |       |        |        |            |
|----|------------------------------------------------------------------------------------------------------------------------|-------|--------|--------|------------|
| 64 | 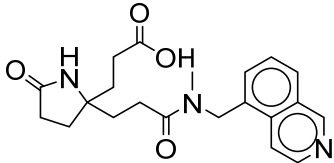<br>038-408-691<br>ZINC000220483024   | nsp16 | -5 ±3  | 31 ±6  | 16 ±4      |
| 65 | <br>028-605-864<br>ZINC000095478169   | nsp16 | -6 ±2  | -53 ±8 | not tested |
| 66 | <br>006-807-837<br>ZINC000020745418   | nsp14 | -8 ±5  | -7 ±2  | not tested |
| 67 | <br>001-002-015<br>ZINC000000370772  | nsp16 | -9 ±12 | -34 ±9 | not tested |
| 68 | <br>001-824-709<br>ZINC000000783765 | nsp16 | -10 ±3 | -3 ±4  | not tested |
| 69 | <br>002-997-525<br>ZINC000104279901 | nsp16 | -14 ±2 | -33 ±4 | not tested |
| 70 | <br>005-328-022<br>ZINC000005360401 | nsp16 | -15 ±7 | 3 ±1   | not tested |

|    |                                                                                                                        |       |              |              |              |
|----|------------------------------------------------------------------------------------------------------------------------|-------|--------------|--------------|--------------|
| 71 | 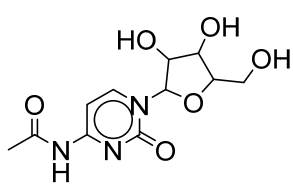<br>000-395-882<br>ZINC000001078602   | nsp16 | -15 ±5       | -9 ±1        | not tested   |
| 72 | <br>002-580-688<br>ZINC000000095711   | nsp16 | -16 ±0       | -77 ±13      | not tested   |
| 73 | <br>002-507-346<br>ZINC000003830391   | nsp16 | -18 ±6       | -8 ±1        | not tested   |
| 74 | <br>002-997-627<br>ZINC000009935252  | nsp16 | not tested** | not tested** | not tested** |
| 75 | <br>007-980-293<br>ZINC000033175254 | nsp16 | not tested** | not tested** | not tested** |
| 76 | <br>035-884-006<br>ZINC000006694156 | nsp16 | not tested** | not tested** | not tested** |
| 77 | <br>001-737-468<br>ZINC000002102009 | nsp16 | not tested** | not tested** | not tested** |
| 78 | <br>021-780-054<br>ZINC000073647922 | nsp16 | not tested** | not tested** | not tested** |

|    |                                                                                                                      |       |              |              |              |
|----|----------------------------------------------------------------------------------------------------------------------|-------|--------------|--------------|--------------|
| 79 | 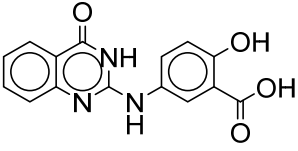<br>021-780-059<br>ZINC000073647929 | nsp16 | not tested** | not tested** | not tested** |
| 80 | <br>000-842-477<br>ZINC000009059943 | nsp14 | not tested** | not tested** | not tested** |
| 81 | <br>007-669-585<br>ZINC000012088756 | nsp14 | not tested** | not tested** | not tested** |

\* NMR and MS analysis indicated that sample contains mixture of compounds

\*\* compound not soluble in DMSO

Table S2. Enzymatic potency, ligand efficiency of commercially available ZINC23398144 hit analogues

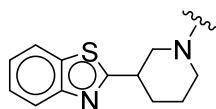

| No | Compound<br>(MolPort ID)<br>(ZINC ID) | Percent inhibition at 100 $\mu$ M, %<br>( $IC_{50}$ , $\mu$ M)<br>(Ligand Efficiency (LE), kcal/mol) |                                                 |                                                 |
|----|---------------------------------------|------------------------------------------------------------------------------------------------------|-------------------------------------------------|-------------------------------------------------|
|    |                                       | nsp14                                                                                                | nsp16                                           | Human                                           |
| 1  | <br>009-161-166<br>ZINC000023398144   | 57 $\pm$ 8<br>$IC_{50}$ =77 $\pm$ 3<br>LE=0.23                                                       | 39 $\pm$ 7<br>$IC_{50}$ =197 $\pm$ 9<br>LE=0.21 | 21 $\pm$ 2<br>$IC_{50}$ =315 $\pm$ 5<br>LE=0.20 |
| 2  | <br>046-188-339                       | 31 $\pm$ 3                                                                                           | 66 $\pm$ 12                                     | not tested                                      |
| 3  | <br>046-114-939                       | 15 $\pm$ 4                                                                                           | 37 $\pm$ 13                                     | not tested                                      |
| 4  | <br>021-760-906                       | 10 $\pm$ 2                                                                                           | 28 $\pm$ 6                                      | not tested                                      |
| 5  | <br>042-575-680                       | 8 $\pm$ 1                                                                                            | 33 $\pm$ 9                                      | not tested                                      |
| 6  | <br>045-938-897                       | 7 $\pm$ 2                                                                                            | -29 $\pm$ 5                                     | not tested                                      |
| 7  | <br>005-679-672                       | 6 $\pm$ 0                                                                                            | -59 $\pm$ 2                                     | not tested                                      |
| 8  | <br>                                  | 5 $\pm$ 3                                                                                            | 15 $\pm$ 8                                      | not tested                                      |

|             |                                                                                   |           |               |            |
|-------------|-----------------------------------------------------------------------------------|-----------|---------------|------------|
| 046-705-372 |                                                                                   |           |               |            |
| 9           | 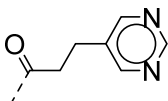 | $5 \pm 3$ | $-45 \pm 13$  | not tested |
| 046-723-388 |                                                                                   |           |               |            |
| 10          |  | $5 \pm 3$ | $-113 \pm 16$ | not tested |
| 046-706-934 |                                                                                   |           |               |            |
| 11          |  | $2 \pm 1$ | $-114 \pm 6$  | not tested |
| 009-436-708 |                                                                                   |           |               |            |
| 12          |  | $2 \pm 0$ | $1 \pm 1$     | not tested |
| 009-447-345 |                                                                                   |           |               |            |

Table S3. Enzymatic potency, ligand efficiency of commercially available ZINC38661771 hit analogues

| No | Compound<br>(MolPort ID)<br>(ZINC ID)                                                                                | Percent inhibition at 100 $\mu$ M, %<br>(IC <sub>50</sub> , $\mu$ M)<br>(Ligand Efficiency (LE), kcal/mol) |                                                       |                                                       |
|----|----------------------------------------------------------------------------------------------------------------------|------------------------------------------------------------------------------------------------------------|-------------------------------------------------------|-------------------------------------------------------|
|    |                                                                                                                      | nsp14                                                                                                      | nsp16                                                 | Human                                                 |
| 1  | 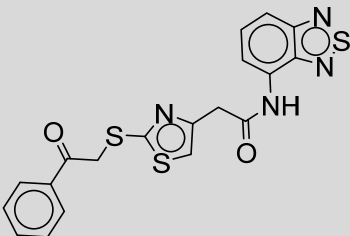<br>009-724-498<br>ZINC000038661771 | 58 $\pm$ 7<br>IC <sub>50</sub> =118 $\pm$ 4<br>LE=0.19                                                     | 69 $\pm$ 8<br>IC <sub>50</sub> =51 $\pm$ 2<br>LE=0.21 | 63 $\pm$ 5<br>IC <sub>50</sub> =58 $\pm$ 3<br>LE=0.21 |
| 2  | <br>005-296-365                     | 27 $\pm$ 2                                                                                                 | -17 $\pm$ 4                                           | not tested                                            |
| 3  | <br>009-741-602                   | 25 $\pm$ 2                                                                                                 | 45 $\pm$ 5                                            | 24 $\pm$ 7                                            |
| 4  | <br>009-639-090                   | 16 $\pm$ 1                                                                                                 | 43 $\pm$ 7                                            | 61 $\pm$ 9                                            |

\* Only 3 ZINC38661771 analogues were purchased due to limited chemical space covered by commercially available compounds – majority of analogues varied with the placement of minor functional groups, mostly halogen atoms, at the terminal benzene ring.

Table S4. Enzymatic potency and ligand efficiency of commercially available SAM analogues

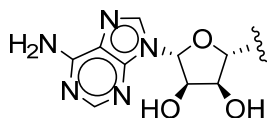

| No | Compound<br>(MolPort ID)<br>(ZINC ID)                                       | Percent inhibition at 100 $\mu$ M, %<br>( $IC_{50}$ , $\mu$ M)<br>(Ligand Efficiency (LE), kcal/mol) |                                              |                                                      |
|----|-----------------------------------------------------------------------------|------------------------------------------------------------------------------------------------------|----------------------------------------------|------------------------------------------------------|
|    |                                                                             | nsp14                                                                                                | nsp16                                        | Human                                                |
| 1  | <br>Sinefungin<br>044-183-244<br>ZINC000004217451                           | $IC_{50}=0.45$<br>$\pm 0.02$<br>LE=0.32                                                              | $IC_{50}=0.86$<br>$\pm 0.04$<br>LE=0.30      | $IC_{50}=316$<br>$\pm 15$<br>LE=0.18                 |
| 2  | <br>S-(5'-Adenosyl)-L-homocysteine (SAH)<br>003-925-198<br>ZINC000004228232 | $IC_{50}=0.14$<br>$\pm 0.01$<br>LE=0.33                                                              | $IC_{50}=0.28$<br>$\pm 0.03$<br>LE=0.32      | $IC_{50}=1.7$<br>$\pm 0.3$<br>LE=0.28                |
| 3  | <br>001-834-574<br>ZINC000004228245                                         | $IC_{50}=1.4$<br>$\pm 0.1$<br>LE=0.40                                                                | $IC_{50}=1.02$<br>$\pm 0.05$<br>LE=0.41      | $IC_{50}=1.8$<br>$\pm 0.2$<br>LE=0.39                |
| 4  | <br>004-959-541<br>ZINC000003861767                                         | $IC_{50}=1.5$<br>$\pm 0.2$<br>LE=0.27                                                                | $IC_{50}=1.14$<br>$\pm 0.06$<br>LE=0.28      | $IC_{50}=2.80$<br>$\pm 0.14$<br>LE=0.26              |
| 5  | <br>046-857-324<br>ZINC000473112262                                         | $IC_{50}=3.1$<br>$\pm 0.3$<br>LE=0.28                                                                | $IC_{50}=2.46$<br>$\pm 0.12$<br>LE=0.28      | $IC_{50}=5.8$<br>$\pm 0.3$<br>LE=0.26                |
| 6  | <br>003-934-134<br>ZINC000048222133                                         | $58 \pm 2$<br>$IC_{50}=53 \pm 3$<br>LE=0.19                                                          | $42 \pm 6$<br>$IC_{50}=105 \pm 6$<br>LE=0.17 | $87 \pm 1$<br>$IC_{50}=25.3$<br>$\pm 1.3$<br>LE=0.20 |
| 7  | <br>047-543-936<br>ZINC000017654909                                         | $62 \pm 2$<br>$IC_{50}=75 \pm 4$<br>LE=0.14                                                          | $65 \pm 7$<br>$IC_{50}=75 \pm 4$<br>LE=0.14  | $98 \pm 2$<br>$IC_{50}=22.8$<br>$\pm 1.2$<br>LE=0.16 |
| 8  | <br>                                                                        | $32 \pm 6$                                                                                           | $54 \pm 10$                                  | $56 \pm 1$                                           |



|                                 |                                                                                     |       |        |            |
|---------------------------------|-------------------------------------------------------------------------------------|-------|--------|------------|
| 039-336-807<br>ZINC000004475116 |                                                                                     |       |        |            |
| 9                               | 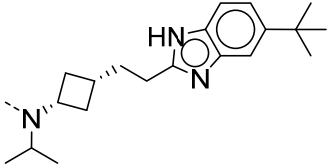   | 30 ±4 | 68 ±7  | not tested |
| 035-706-611<br>ZINC000100074350 |                                                                                     |       |        |            |
| 10                              |    | 28 ±2 | 14 ±3  | not tested |
| 046-417-911<br>ZINC000028567519 |                                                                                     |       |        |            |
| 11                              |    | 22 ±5 | 1 ±5   | not tested |
| 046-594-122<br>ZINC000584905214 |                                                                                     |       |        |            |
| 12                              |   | 20 ±3 | 50 ±11 | 89 ±8      |
| 046-683-328<br>ZINC000036477981 |                                                                                     |       |        |            |
| 13                              |  | 8 ±5  | 34 ±6  | not tested |
| 046-416-871<br>ZINC000013488353 |                                                                                     |       |        |            |

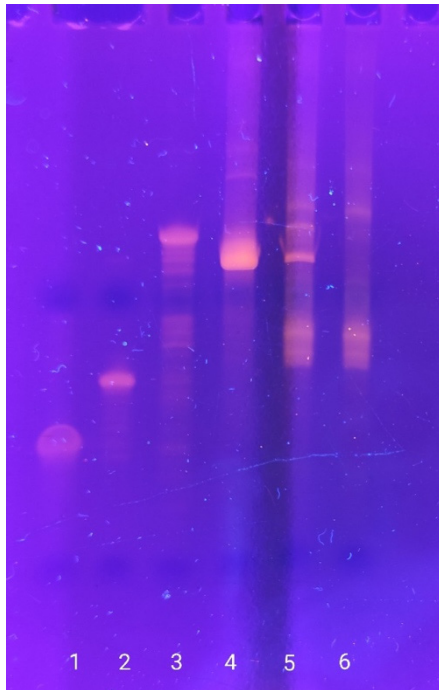

Figure S1. Analysis of RNA transcripts by 20 % polyacrylamide denaturing gel electrophoresis.

1. – 5.8 kDa standard
2. – 8.3 kDa
3. – 19.3 kDa
4. – DNA template
5. - m7G(5')ppp(5')Co25 co-transcriptionally capped RNA, before DNase digestion
6. - m7G(5')ppp(5')Co25 co-transcriptionally capped RNA, after DNase digestion, desalted
